# Supplementary material for: Impact of seasonal malaria chemoprevention on prevalence of malaria infection in malaria indicator surveys in Burkina Faso and Nigeria
Source: PubMed Central journal article supplement — BMJ Glob Health. 2022 May 18;7(5):e008021. doi: 10.1136/bmjgh-2021-008021 (PMC9121431; doi:10.1136/bmjgh-2021-008021), 2022-05-18
Supplement: bmjgh-2021-008021supp001.pdf [file bmjgh-2021-008021supp001.pdf]

## SUPPLEMENTAL MATERIAL

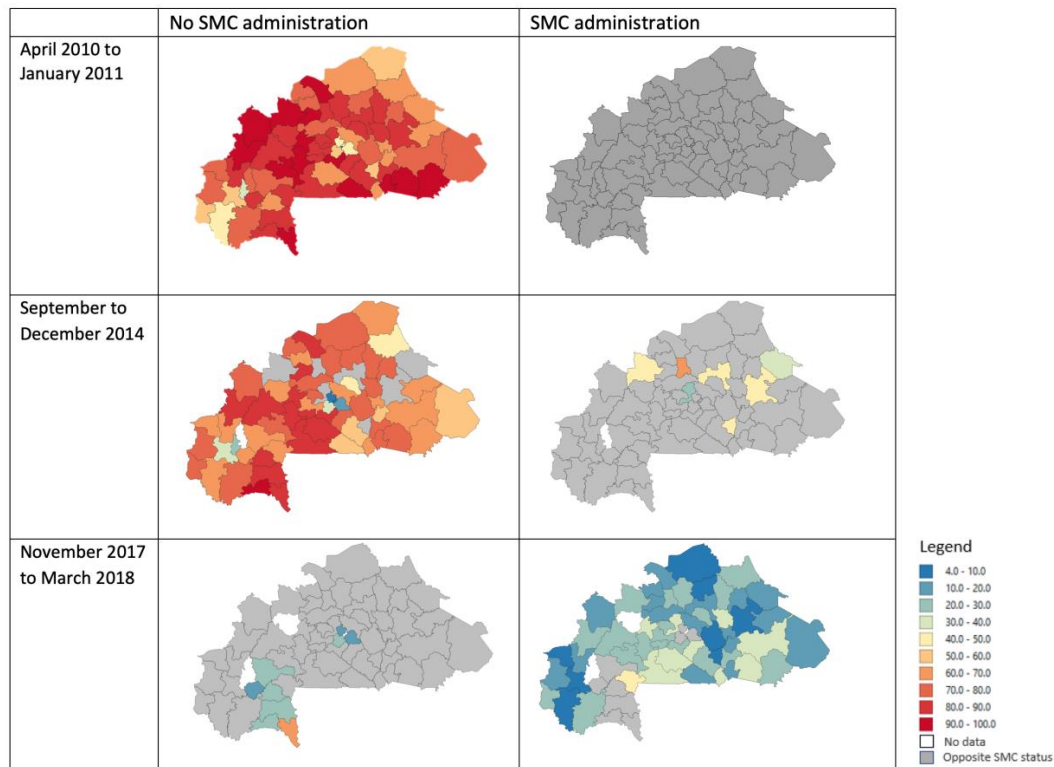

**Supplement 1. Prevalence of RDT-confirmed malaria by district and SMC administration status over 2010–2018, Burkina Faso.** Data shown are for prevalence of RDT-confirmed malaria infection by health district and SMC administration across the three DHS/MIS surveys in Burkina Faso. Districts in white did not have a cluster located in that district during data collection for that year. Districts in grey are of the opposite SMC administration status that year. Districts with no SMC administration surveyed April 2010 to January 2011 (A),

**Supplement 2. Survey respondent characteristics, Burkina Faso**

|                              | 2010<br>(N=6377) | 2014<br>(N=6081) | 2017<br>(N=5558) | Total<br>(N=18016) |
|------------------------------|------------------|------------------|------------------|--------------------|
| <b>Malaria by RDT</b>        |                  |                  |                  |                    |
| No                           | 1481 (23.2%)     | 2150 (35.4%)     | 4417 (79.5%)     | 8048 (44.7%)       |
| Yes                          | 4562 (71.5%)     | 3914 (64.4%)     | 1139 (20.5%)     | 9615 (53.4%)       |
| Missing                      | 334 (5.2%)       | 17 (0.3%)        | 2 (0.0%)         | 353 (2.0%)         |
| <b>Malaria by microscopy</b> |                  |                  |                  |                    |
| No                           | 2120 (33.2%)     | 3170 (52.1%)     | 4584 (82.5%)     | 9874 (54.8%)       |
| Yes                          | 3901 (61.2%)     | 2870 (47.2%)     | 965 (17.4%)      | 7736 (42.9%)       |
| Missing                      | 356 (5.6%)       | 41 (0.7%)        | 9 (0.2%)         | 406 (2.3%)         |
| <b>SMC</b>                   |                  |                  |                  |                    |
| No SMC                       | 6377 (100%)      | 5411 (89.0%)     | 663 (11.9%)      | 12451 (69.1%)      |
| During SMC                   | 0 (0%)           | 610 (10.0%)      | 0 (0%)           | 610 (3.4%)         |
| 1 month post-SMC             | 0 (0%)           | 0 (0%)           | 50 (0.9%)        | 50 (0.3%)          |

|                             |                        |                      |                            |                          |
|-----------------------------|------------------------|----------------------|----------------------------|--------------------------|
| 2 months post-SMC           | 0 (0%)                 | 0 (0%)               | 246 (4.4%)                 | 246 (1.4%)               |
| 3 month post-SMC            | 0 (0%)                 | 0 (0%)               | 742 (13.4%)                | 742 (4.1%)               |
| 4 months post-SMC           | 0 (0%)                 | 0 (0%)               | 3457 (62.2%)               | 3457 (19.2%)             |
| 5 months post-SMC           | 0 (0%)                 | 0 (0%)               | 351 (6.3%)                 | 351 (1.9%)               |
| Missing                     | 0 (0%)                 | 60 (1.0%)            | 49 (0.9%)                  | 109 (0.6%)               |
| <b>Child's age (months)</b> |                        |                      |                            |                          |
| 6-11                        | 731 (11.5%)            | 657 (10.8%)          | 608 (10.9%)                | 1996 (11.1%)             |
| 12-23                       | 1416 (22.2%)           | 1292 (21.2%)         | 1155 (20.8%)               | 3863 (21.4%)             |
| 24-35                       | 1415 (22.2%)           | 1388 (22.8%)         | 1207 (21.7%)               | 4010 (22.3%)             |
| 36-47                       | 1439 (22.6%)           | 1404 (23.1%)         | 1329 (23.9%)               | 4172 (23.2%)             |
| 48-59                       | 1376 (21.6%)           | 1340 (22.0%)         | 1259 (22.7%)               | 3975 (22.1%)             |
| <b>Sex</b>                  |                        |                      |                            |                          |
| Female                      | 3103 (48.7%)           | 2994 (49.2%)         | 2751 (49.5%)               | 8848 (49.1%)             |
| Male                        | 3274 (51.3%)           | 3087 (50.8%)         | 2807 (50.5%)               | 9168 (50.9%)             |
| <b>Net use</b>              |                        |                      |                            |                          |
| None                        | 3213 (50.4%)           | 1479 (24.3%)         | 2574 (46.3%)               | 7266 (40.3%)             |
| Net use                     | 3164 (49.6%)           | 4602 (75.7%)         | 2984 (53.7%)               | 10750 (59.7%)            |
| <b>Wealth quintile</b>      |                        |                      |                            |                          |
| Poorest                     | 1292 (20.3%)           | 1339 (22.0%)         | 1131 (20.3%)               | 3762 (20.9%)             |
| Poor                        | 1288 (20.2%)           | 1375 (22.6%)         | 1208 (21.7%)               | 3871 (21.5%)             |
| Middle                      | 1365 (21.4%)           | 1404 (23.1%)         | 1181 (21.2%)               | 3950 (21.9%)             |
| Richer                      | 1363 (21.4%)           | 1342 (22.1%)         | 1136 (20.4%)               | 3841 (21.3%)             |
| Richest                     | 1069 (16.8%)           | 621 (10.2%)          | 902 (16.2%)                | 2592 (14.4%)             |
| <b>Urbanisation</b>         |                        |                      |                            |                          |
| Urban                       | 1426 (22.4%)           | 921 (15.1%)          | 857 (15.4%)                | 3204 (17.8%)             |
| Rural                       | 4951 (77.6%)           | 5160 (84.9%)         | 4701 (84.6%)               | 14812 (82.2%)            |
| <b>Treatment seeking</b>    |                        |                      |                            |                          |
| None                        | 4592 (72.0%)           | 3096 (50.9%)         | 4537 (81.6%)               | 12225 (67.9%)            |
| Treatment seeking           | 531 (8.3%)             | 1226 (20.2%)         | 604 (10.9%)                | 2361 (13.1%)             |
| Missing                     | 1254 (19.7%)           | 1759 (28.9%)         | 417 (7.5%)                 | 3430 (19.0%)             |
| <b>Month</b>                |                        |                      |                            |                          |
| Mean (SD)                   | 9.45 (1.74)            | 10.4 (0.544)         | 2.91 (2.97)                | 7.76 (3.81)              |
| Median [Min, Max]           | 10.0 [1.00, 12.0]      | 10.0 [9.00, 12.0]    | 2.00 [1.00, 12.0]          | 10.0 [1.00, 12.0]        |
| <b>Rainfall (m)</b>         |                        |                      |                            |                          |
| Mean (SD)                   | 0.415 (0.186)          | 0.492 (0.109)        | 0.0267 (0.0631)            | 0.327 (0.238)            |
| Median [Min, Max]           | 0.413 [0.00699, 0.847] | 0.512 [0.172, 0.686] | 0.00461 [0.0000537, 0.384] | 0.373 [0.0000537, 0.847] |
| Missing                     | 399 (6.3%)             | 128 (2.1%)           | 503 (9.1%)                 | 1030 (5.7%)              |

### Supplement 3. Stratum specific characteristics and odds ratios of microscopy-diagnosed malaria in children, Burkina Faso

| Variable          | Total<br>(N=18016) | Malaria by<br>microscopy | Unadjusted <sup>1</sup> |                          | Adjusted <sup>2</sup> |                          |
|-------------------|--------------------|--------------------------|-------------------------|--------------------------|-----------------------|--------------------------|
|                   | N (%)              | % (95% CI)               | OR (95% CI)             | P-<br>Value <sup>3</sup> | OR (95% CI)           | P-<br>Value <sup>3</sup> |
| <b>SMC</b>        |                    |                          |                         |                          |                       |                          |
| No SMC            | 12451 (69.1%)      | 54.2 (53.2–55.2)         | 1.00 (Base)             |                          | 1.00 (Base)           |                          |
| During SMC        | 610 (3.4%)         | 26.2 (25.3–27.1)         | 0.26 (0.21–0.33)        | <0.001                   | 0.38 (0.29–0.52)      | <0.001                   |
| 1 month post-SMC  | 50 (0.3%)          | 14.0 (13.3–14.7)         | 0.19 (0.08–0.44)        | <0.001                   | 0.61 (0.22–1.72)      | 0.35                     |
| 2 months post-SMC | 246 (1.4%)         | 15.0 (14.3–15.7)         | 0.18 (0.12–0.27)        | <0.001                   | 0.50 (0.24–1.04)      | 0.07                     |
| 3 months post-SMC | 742 (4.1%)         | 21.8 (21.0–22.6)         | 0.18 (0.15–0.22)        | <0.001                   | 0.73 (0.50–1.06)      | 0.10                     |
| 4 months post-SMC | 3457 (19.2%)       | 15.6 (14.9–16.3)         | 0.11 (0.10–0.13)        | <0.001                   | 0.44 (0.32–0.61)      | <0.001                   |
| 5 months post-SMC | 351 (1.9%)         | 12.5 (11.9–13.1)         | 0.11 (0.08–0.16)        | <0.001                   | 0.45 (0.27–0.73)      | <0.001                   |

|                             |                         |                          |                     |        |                  |        |
|-----------------------------|-------------------------|--------------------------|---------------------|--------|------------------|--------|
| Missing                     | 109 (0.6%)              |                          |                     |        |                  |        |
| <b>year</b>                 |                         |                          |                     |        |                  |        |
| 2010                        | 6377 (35.4%)            | 61.2 (60.2–62.2)         | 1.00 (Base)         |        | 1.00 (Base)      |        |
| 2014                        | 6081 (33.8%)            | 47.2 (46.2–48.2)         | 0.46 (0.42–0.50)    | <0.001 | 0.41 (0.36–0.46) | <0.001 |
| 2017                        | 552 (3.1%)              | 11.4 (10.8–12.0)         | 0.16 (0.11–0.22)    | <0.001 | 0.22 (0.12–0.40) | <0.001 |
| 2018                        | 5006 (27.8%)            | 18.0 (17.2–18.8)         | 0.09 (0.08–0.10)    | <0.001 | 0.14 (0.10–0.20) | <0.001 |
| <b>Sex</b>                  |                         |                          |                     |        |                  |        |
| Female                      | 8848 (49.1%)            | 43.5 (42.5–44.5)         | 1.00 (Base)         |        | 1.00 (Base)      |        |
| Male                        | 9168 (50.9%)            | 42.4 (41.4–43.4)         | 0.97 (0.91–1.03)    | 0.304  | 0.95 (0.87–1.03) | 0.19   |
| <b>Child's age (months)</b> |                         |                          |                     |        |                  |        |
| 6–11                        | 1996 (11.1%)            | 33.6 (32.7–34.5)         | 1.00 (Base)         |        | 1.00 (Base)      |        |
| 12–23                       | 3863 (21.4%)            | 37.9 (36.9–38.9)         | 1.21 (1.07–1.37)    | 0.002  | 1.25 (1.08–1.46) | <0.001 |
| 24–35                       | 4010 (22.3%)            | 44.2 (43.2–45.2)         | 1.59 (1.41–1.80)    | <0.001 | 1.63 (1.40–1.89) | <0.001 |
| 36–47                       | 4172 (23.2%)            | 47.2 (46.2–48.2)         | 1.73 (1.53–1.94)    | <0.001 | 1.96 (1.69–2.27) | <0.001 |
| 48–59                       | 3975 (22.1%)            | 46.8 (45.8–47.8)         | 1.73 (1.54–1.95)    | <0.001 | 1.95 (1.67–2.26) | <0.001 |
| <b>Net use</b>              |                         |                          |                     |        |                  |        |
| None                        | 7266 (40.3%)            | 44.8 (43.8–45.8)         | 1.00 (Base)         |        | 1.00 (Base)      |        |
| Net use                     | 10750 (59.7%)           | 41.7 (40.7–42.7)         | 0.88 (0.83–0.94)    | <0.001 | 0.93 (0.85–1.01) | 0.10   |
| <b>Wealth quintile</b>      |                         |                          |                     |        |                  |        |
| Poorest                     | 3762 (20.9%)            | 51.4 (50.4–52.4)         | 1.00 (Base)         |        | 1.00 (Base)      |        |
| Poor                        | 3871 (21.5%)            | 48.8 (47.8–49.8)         | 0.91 (0.82–1.00)    | 0.057  | 0.86 (0.76–0.98) | 0.02   |
| Middle                      | 3950 (21.9%)            | 47.0 (46.0–48.0)         | 0.88 (0.80–0.98)    | 0.014  | 0.83 (0.73–0.95) | 0.01   |
| Richer                      | 3841 (21.3%)            | 41.2 (40.2–42.2)         | 0.71 (0.64–0.79)    | <0.001 | 0.73 (0.64–0.83) | <0.001 |
| Richest                     | 2592 (14.4%)            | 18.2 (17.4–19.0)         | 0.26 (0.23–0.30)    | <0.001 | 0.35 (0.29–0.42) | <0.001 |
| <b>Urbanicity</b>           |                         |                          |                     |        |                  |        |
| Urban                       | 3204 (17.8%)            | 22.3 (21.5–23.1)         | 1.00 (Base)         |        | 1.00 (Base)      |        |
| Rural                       | 14812 (82.2%)           | 47.4 (46.4–48.4)         | 2.64 (2.38–2.93)    | <0.001 | 2.50 (2.16–2.90) | <0.001 |
| <b>Treatment seeking</b>    |                         |                          |                     |        |                  |        |
| None                        | 12225 (67.9%)           | 41.5 (40.5–42.5)         | 1.00 (Base)         |        | 1.00 (Base)      |        |
| Treatment seeking           | 2361 (13.1%)            | 33.4 (32.5–34.3)         | 0.7 (0.63–0.77)     | <0.001 | 0.71 (0.64–0.80) | <0.001 |
| Missing                     | 3430 (19.0%)            |                          |                     |        |                  |        |
| <b>Month</b>                |                         |                          | 1.00 (Base)         |        |                  |        |
| Mean (SD)                   | 7.76 (3.81)             | 8.98 (2.88)              | 1.22 (1.21–1.23)    | <0.001 |                  |        |
| Median [Min, Max]           | 10.0 [1.00, 12.0]       | 10.0 [1.00, 12.0]        |                     |        |                  |        |
| <b>Rainfall (m)</b>         |                         |                          |                     |        |                  |        |
| Mean (SD)                   | 0.327 (0.238)           | 0.400 (0.200)            | 19.91 (17.02–23.29) | <0.001 | 0.88 (0.57–1.37) | 0.57   |
| Median [Min, Max]           | 0.373 [0.000537, 0.847] | 0.430 [0.0000537, 0.847] |                     |        |                  |        |
| Missing                     | 1030 (5.7%)             | 404 (5.2%)               |                     |        |                  |        |

<sup>1</sup>Odds ratios calculated using multilevel generalized linear model for binary outcomes with random intercepts for health district

<sup>2</sup> Odds ratios calculated using multilevel generalized additive model for binary outcomes with random intercepts for health district adjusted for SMC, year, age, sex, use of a net the night before data collection, wealth quintile, urbanicity, rainfall, and treatment seeking behaviour (edf 0.605, p=0.139)

<sup>3</sup>Wald-p value

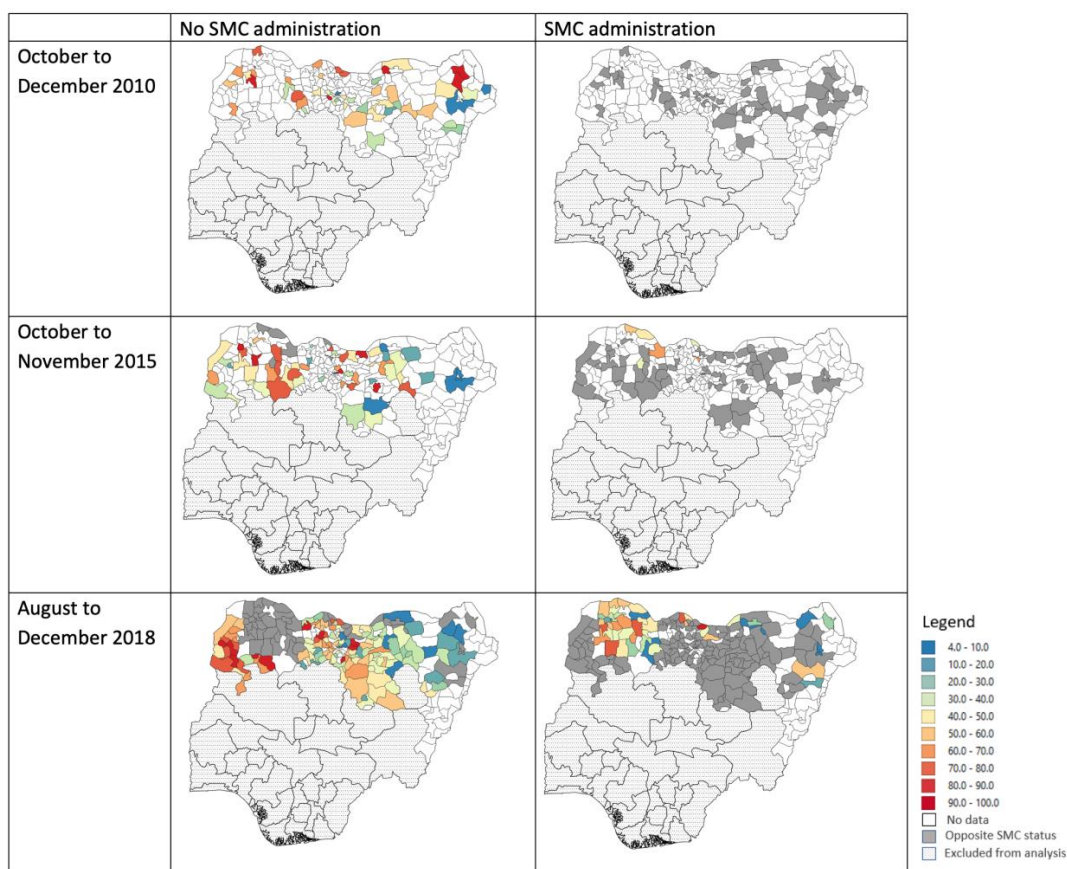

**Supplement 4. Prevalence of RDT-confirmed malaria by district and SMC administration status over 2010–2018, Nigeria.** Data shown are for prevalence of RDT-confirmed malaria infection by LGA and SMC administration across the three DHS/MIS surveys in Nigeria. LGAs in white did not have a cluster located in that district during data collection for that year. LGAs in grey are of the opposite SMC administration status that year. LGAs in dots were not originally eligible for SMC and therefore excluded from this analysis.

#### Supplement 5. Survey respondent characteristics, Nigeria

|                              | 2010<br>(N=1551) | 2015<br>(N=1812) | 2018<br>(N=3298) | Total<br>(N=6661) |
|------------------------------|------------------|------------------|------------------|-------------------|
| <b>Malaria by RDT</b>        |                  |                  |                  |                   |
| No                           | 655 (42.2%)      | 889 (49.1%)      | 1729 (52.4%)     | 3273 (49.1%)      |
| Yes                          | 894 (57.6%)      | 921 (50.8%)      | 1559 (47.3%)     | 3374 (50.7%)      |
| Missing                      | 2 (0.1%)         | 2 (0.1%)         | 10 (0.3%)        | 14 (0.2%)         |
| <b>Malaria by microscopy</b> |                  |                  |                  |                   |
| No                           | 850 (54.8%)      | 1142 (63.0%)     | 1625 (49.3%)     | 3617 (54.3%)      |
| Yes                          | 697 (44.9%)      | 585 (32.3%)      | 701 (21.3%)      | 1983 (29.8%)      |
| Missing                      | 4 (0.3%)         | 85 (4.7%)        | 972 (29.5%)      | 1061 (15.9%)      |
| <b>SMC</b>                   |                  |                  |                  |                   |
| No SMC                       | 1551 (100%)      | 1601 (88.4%)     | 2360 (71.6%)     | 5512 (82.8%)      |
| During SMC                   | 0 (0%)           | 211 (11.6%)      | 827 (25.1%)      | 1038 (15.6%)      |

|                             |                      |                       |                      |                       |
|-----------------------------|----------------------|-----------------------|----------------------|-----------------------|
| 1 month post-SMC            | 0 (0%)               | 0 (0%)                | 111 (3.4%)           | 111 (1.7%)            |
| <b>Child's age (months)</b> |                      |                       |                      |                       |
| 6-11                        | 158 (10.2%)          | 128 (7.1%)            | 372 (11.3%)          | 658 (9.9%)            |
| 12-23                       | 301 (19.4%)          | 391 (21.6%)           | 746 (22.6%)          | 1438 (21.6%)          |
| 24-35                       | 327 (21.1%)          | 396 (21.9%)           | 676 (20.5%)          | 1399 (21.0%)          |
| 36-47                       | 341 (22.0%)          | 452 (24.9%)           | 762 (23.1%)          | 1555 (23.3%)          |
| 48-59                       | 424 (27.3%)          | 445 (24.6%)           | 742 (22.5%)          | 1611 (24.2%)          |
| <b>Sex</b>                  |                      |                       |                      |                       |
| Female                      | 780 (50.3%)          | 891 (49.2%)           | 1619 (49.1%)         | 3290 (49.4%)          |
| Male                        | 771 (49.7%)          | 921 (50.8%)           | 1679 (50.9%)         | 3371 (50.6%)          |
| <b>Net use</b>              |                      |                       |                      |                       |
| None                        | 891 (57.4%)          | 688 (38.0%)           | 1033 (31.3%)         | 2612 (39.2%)          |
| Net use                     | 660 (42.6%)          | 1124 (62.0%)          | 2265 (68.7%)         | 4049 (60.8%)          |
| <b>Wealth quintile</b>      |                      |                       |                      |                       |
| Poorest                     | 559 (36.0%)          | 809 (44.6%)           | 1387 (42.1%)         | 2755 (41.4%)          |
| Poor                        | 384 (24.8%)          | 431 (23.8%)           | 866 (26.3%)          | 1681 (25.2%)          |
| Middle                      | 375 (24.2%)          | 272 (15.0%)           | 563 (17.1%)          | 1210 (18.2%)          |
| Richer                      | 149 (9.6%)           | 195 (10.8%)           | 321 (9.7%)           | 665 (10.0%)           |
| Richest                     | 84 (5.4%)            | 105 (5.8%)            | 161 (4.9%)           | 350 (5.3%)            |
| <b>Urbanisation</b>         |                      |                       |                      |                       |
| Urban                       | 289 (18.6%)          | 456 (25.2%)           | 738 (22.4%)          | 1483 (22.3%)          |
| Rural                       | 1262 (81.4%)         | 1356 (74.8%)          | 2560 (77.6%)         | 5178 (77.7%)          |
| <b>Month</b>                |                      |                       |                      |                       |
| Aug                         | 0 (0%)               | 0 (0%)                | 275 (8.3%)           | 275 (4.1%)            |
| Sep                         | 0 (0%)               | 0 (0%)                | 888 (26.9%)          | 888 (13.3%)           |
| Oct                         | 950 (61.3%)          | 1230 (67.9%)          | 820 (24.9%)          | 3000 (45.0%)          |
| Nov                         | 536 (34.6%)          | 582 (32.1%)           | 655 (19.9%)          | 1773 (26.6%)          |
| Dec                         | 65 (4.2%)            | 0 (0%)                | 660 (20.0%)          | 725 (10.9%)           |
| <b>Treatment seeking</b>    |                      |                       |                      |                       |
| None                        | 971 (62.6%)          | 1265 (69.8%)          | 1973 (59.8%)         | 4209 (63.2%)          |
| Treatment seeking           | 360 (23.2%)          | 361 (19.9%)           | 431 (13.1%)          | 1152 (17.3%)          |
| Missing                     | 220 (14.2%)          | 186 (10.3%)           | 894 (27.1%)          | 1300 (19.5%)          |
| <b>Rainfall (m)</b>         |                      |                       |                      |                       |
| Mean (SD)                   | 0.534 (0.155)        | 0.539 (0.145)         | 0.454 (0.170)        | 0.496 (0.166)         |
| Median [Min, Max]           | 0.546 [0.126, 0.768] | 0.535 [0.303, 0.1030] | 0.480 [0.103, 0.827] | 0.512 [0.103, 0.1030] |

### Supplement 6. Stratum specific characteristics and odds ratios of microscopy-diagnosed malaria in children, Nigeria

| Variable                    | Total<br>(N=18016) | Malaria by<br>microscopy | Unadjusted <sup>1</sup> |                      | Adjusted <sup>2</sup> |                      |
|-----------------------------|--------------------|--------------------------|-------------------------|----------------------|-----------------------|----------------------|
|                             | N (%)              | % (95% CI)               | OR (95% CI)             | P-Value <sup>3</sup> | OR (95% CI)           | P-Value <sup>3</sup> |
| <b>SMC</b>                  |                    |                          |                         |                      |                       |                      |
| No SMC                      | 5512 (82.8)        | 31.3 (30.4–32.2)         | 1.00 (Base)             |                      | 1.00 (Base)           |                      |
| During SMC                  | 1038 (15.6)        | 23.8 (23.0–24.6)         | 0.59 (0.45–0.77)        | <0.001               | 0.53 (0.38–0.76)      | <0.001               |
| 1 month post-SMC            | 111 (1.7)          | 7.2 (6.7–7.7)            | 0.33 (0.14–0.78)        | <b>0.012</b>         | 0.58 (0.23–1.52)      | 0.27                 |
| <b>year</b>                 |                    |                          |                         |                      |                       |                      |
| 2010                        | 1551 (23.3)        | 44.9 (43.9–45.9)         | 1.00 (Base)             |                      | 1.00 (Base)           |                      |
| 2015                        | 1812 (27.2)        | 32.3 (31.4–33.2)         | 0.55 (0.43–0.69)        | <0.001               | 0.68 (0.52–0.89)      | <b>0.01</b>          |
| 2018                        | 3298 (49.5)        | 21.3 (20.5–22.1)         | 0.45 (0.37–0.55)        | <0.001               | 0.55 (0.40–0.74)      | <0.001               |
| <b>Sex</b>                  |                    |                          |                         |                      |                       |                      |
| Female                      | 3290 (49.4)        | 29.4 (28.5–30.3)         | 1.00 (Base)             |                      | 1.00 (Base)           |                      |
| Male                        | 3371 (50.6)        | 30.1 (29.2–31.0)         | 1.04 (0.92–1.17)        | 0.58                 | 1.08 (0.93–1.24)      | 0.35                 |
| <b>Child's age (months)</b> |                    |                          |                         |                      |                       |                      |

|                          |                       |                      |                  |                  |                  |                  |
|--------------------------|-----------------------|----------------------|------------------|------------------|------------------|------------------|
| 6–11                     | 658 (9.9)             | 21.4 (20.6–22.2)     | 1.00 (Base)      |                  | 1.00 (Base)      |                  |
| 12–23                    | 1438 (21.6)           | 25.2 (24.3–26.1)     | 1.18 (0.92–1.51) | 0.206            | 1.13 (0.85–1.49) | 0.42             |
| 24–35                    | 1399 (21.0)           | 28.4 (27.5–29.3)     | 1.5 (1.17–1.93)  | <b>&lt;0.001</b> | 1.48 (1.12–1.97) | <b>0.01</b>      |
| 36–47                    | 1555 (23.3)           | 30.9 (30.0–31.8)     | 1.78 (1.39–2.27) | <b>&lt;0.001</b> | 1.75 (1.33–2.31) | <b>&lt;0.001</b> |
| 48–59                    | 1611 (24.2)           | 37.2 (36.3–38.1)     | 2.46 (1.93–3.13) | <b>&lt;0.001</b> | 2.29 (1.74–3.02) | <b>&lt;0.001</b> |
| <b>Net use</b>           |                       |                      |                  |                  |                  |                  |
| None                     | 2612 (39.2)           | 33.2 (32.3–34.1)     | 1.00 (Base)      |                  | 1.00 (Base)      |                  |
| Net use                  | 4049 (60.8)           | 27.5 (26.6–28.4)     | 0.79 (0.69–0.90) | <b>&lt;0.001</b> | 0.84 (0.72–0.98) | <b>0.03</b>      |
| <b>Month</b>             |                       |                      |                  |                  |                  |                  |
| Aug                      | 275 (4.1)             | 11.6 (11.0–12.2)     | 1.00 (Base)      |                  | 1.00 (Base)      |                  |
| Sep                      | 888 (13.3)            | 25.8 (24.9–26.7)     | 2.34 (1.38–3.96) | <b>0.002</b>     | 1.00 (0.50–2.00) | 0.99             |
| Oct                      | 3000 (45.0)           | 33.8 (32.9–34.7)     | 3.29 (2.01–5.37) | <b>&lt;0.001</b> | 1.44 (0.76–2.75) | 0.28             |
| Nov                      | 1773 (26.6)           | 32.7 (31.8–33.6)     | 3.35 (2.04–5.51) | <b>&lt;0.001</b> | 2.69 (1.26–5.73) | <b>0.02</b>      |
| Dec                      | 725 (10.9)            | 17.7 (17.0–18.4)     | 1.84 (1.05–3.21) | <b>0.032</b>     | 2.07 (0.92–4.70) | 0.09             |
| <b>Wealth quintile</b>   |                       |                      |                  |                  |                  |                  |
| Poorest                  | 2755 (41.4)           | 36.2 (35.3–37.1)     | 1.00 (Base)      |                  | 1.00 (Base)      |                  |
| Poor                     | 1681 (25.2)           | 32.9 (32.0–33.8)     | 0.85 (0.72–0.99) | <b>0.042</b>     | 0.81 (0.67–0.97) | <b>0.02</b>      |
| Middle                   | 1210 (18.2)           | 25.4 (24.5–26.3)     | 0.49 (0.40–0.59) | <b>&lt;0.001</b> | 0.55 (0.43–0.69) | <b>&lt;0.001</b> |
| Richer                   | 665 (10.0)            | 14.7 (14.0–15.4)     | 0.31 (0.23–0.41) | <b>&lt;0.001</b> | 0.43 (0.31–0.60) | <b>&lt;0.001</b> |
| Richest                  | 350 (5.3)             | 8.3 (7.8–8.8)        | 0.17 (0.11–0.27) | <b>&lt;0.001</b> | 0.24 (0.14–0.40) | <b>&lt;0.001</b> |
| <b>Urbanicity</b>        |                       |                      |                  |                  |                  |                  |
| Urban                    | 1483 (22.3)           | 13.1 (12.4–13.8)     | 1.00 (Base)      |                  | 1.00 (Base)      |                  |
| Rural                    | 5178 (77.7)           | 34.6 (33.7–35.5)     | 4.55 (3.59–5.78) | <b>&lt;0.001</b> | 3.14 (2.34–4.22) | <b>&lt;0.001</b> |
| <b>Treatment seeking</b> |                       |                      |                  |                  |                  |                  |
| None                     | 4209 (63.2)           | 28.8 (27.9–29.7)     | 1.00 (Base)      |                  | 1.00 (Base)      |                  |
| Treatment seeking        | 1152 (17.3)           | 33.9 (33.0–34.8)     | 1.16 (0.98–1.38) | 0.078            | 1.18 (0.99–1.40) | 0.08             |
| Missing                  | 1300 (19.5)           |                      |                  |                  |                  |                  |
| <b>Rainfall (m)</b>      |                       |                      |                  |                  | 1.00 (Base)      |                  |
| Mean (SD)                | 0.496 (0.166)         | 0.531 (0.154)        | 2.93 (1.68–5.09) | <b>&lt;0.001</b> | 2.48 (0.77–7.98) | <b>0.129</b>     |
| Median [Min, Max]        | 0.512 [0.103, 0.1030] | 0.546 [0.107, 0.827] |                  |                  |                  |                  |

<sup>1</sup>Odds ratios calculated using multilevel generalized linear model for binary outcomes with random intercepts for LGA

<sup>2</sup> Odds ratios calculated using multilevel generalized linear model for binary outcomes with random intercepts for district adjusted for SMC, year, age, sex, use of a net the night before data collection, wealth quintile, urbanicity, rainfall, month, and treatment seeking behaviour

<sup>3</sup>Wald-p value
